# Supplementary material for: A simple and easily implemented risk model to predict 1-year ischemic stroke and systemic embolism in Chinese patients with atrial fibrillation
Source: PubMed Central journal article supplement — Chin Med J (Engl). 2021 May 25;134(19):2293–8. doi: 10.1097/CM9.0000000000001515 (PMC8509992; doi:10.1097/cm9.0000000000001515), 2021-05-25
Supplement: cm9-134-2293-s001.pdf [file cm9-134-2293-s001.pdf]

**Supplementary Table 1: Candidate covariate list for multivariate modeling.**

---

**Demographics**

Age, years

Sex, male/female

**Vital signs**

Systolic blood pressure, mmHg

Diastolic blood pressure, mmHg

Heart rate, bpm

Lifestyle factors

Body mass index, kg/m<sup>2</sup>

Current smoking, yes/no

Current drinking, yes/no

**AF diagnosis**

AF type, first diagnosed/paroxysmal/persistent AF

**Medical history**

Hypertension, yes/no

Diabetes mellitus, yes/no

Heart failure, yes/no

NYHA classification, I/II/III/IV

Vascular disease, yes/no

Coronary heart disease, yes/no

Myocardial infarction, yes/no

Peripheral artery disease, yes/no

Prior ischemic stroke, yes/no

Prior systemic embolism, yes/no

Prior transient ischemic attack, yes/no

Hyperlipidemia, yes/no

Prior bleeding, yes/no

Intracranial hemorrhage, yes/no

Chronic kidney disease, yes/no

---

Abnormal liver function, yes/no

Thyroid disease, yes/no

**Echocardiographic assessment**

LVEF, %

Anteroposterior left atrial diameter, mm

Left ventricular posterior wall, mm

**Laboratory data**

Hemoglobin, g/L

Creatinine, mmol/L

Fasting blood glucose, mmol/L

Total cholesterol, mmol/L

Total triglyceride, mmol/L

Low-density lipoprotein cholesterol, mmol/L

High-density lipoprotein cholesterol, mmol/L

**Combined variables**

Heart failure or LVEF <40%, yes/no

Heart failure or LVEF <45%, yes/no

Heart failure or LVEF <50%, yes/no

Heart failure or LVEF <55%, yes/no

Hypertension and diabetes mellitus, yes/no

Hypertension and vascular disease, yes/no

Diabetes mellitus and vascular disease, yes/no

Hypertension and diabetes mellitus and vascular disease, yes/no

---

Vascular disease was defined as coronary heart disease or peripheral artery disease; chronic kidney disease was defined as eGFR <60 mL/min/1.73 m<sup>2</sup>; abnormal liver function was defined as ALT or AST >2 × ULN; and thyroid disease was defined as hyperthyroidism or hypothyroidism. AF: Atrial fibrillation; LVEF: Left ventricular ejection fraction.

**Supplementary Table 2: Proportion of patients who will experience TEs identified by CAS and CHA<sub>2</sub>DS<sub>2</sub>-VA stroke risk score by classifying a specific proportion of cases as high-risk patients.**

| <b>Specific proportion of cases to be classified as high-risk patients (%)</b> | <b>Proportion of patients who will experience TEs identified by CAS score (%)</b> | <b>Proportion of patients who will experience TEs identified by CHA<sub>2</sub>DS<sub>2</sub>-VA score (%)</b> |
|--------------------------------------------------------------------------------|-----------------------------------------------------------------------------------|----------------------------------------------------------------------------------------------------------------|
| 20                                                                             | 42.6                                                                              | 37.0                                                                                                           |
| 40                                                                             | 66.3                                                                              | 62.9                                                                                                           |
| 60                                                                             | 83.1                                                                              | 81.4                                                                                                           |
| 80                                                                             | 94.0                                                                              | 92.4                                                                                                           |
| 65.7 (CHA <sub>2</sub> DS <sub>2</sub> -VA $\geq 2$ )                          | 87.8                                                                              | 86.3                                                                                                           |
| 84.8 (CHA <sub>2</sub> DS <sub>2</sub> -VA $\geq 1$ )                          | 95.4                                                                              | 94.4                                                                                                           |
| 69.2 (CAS $\geq 1$ )                                                           | 90.7                                                                              | 87.8                                                                                                           |

CAS: Congestive heart failure or left ventricular dysfunction, Age, and prior Stroke; TEs: Thromboembolic events.

**Supplementary Table 3: To identify a specific proportion of patients who will experience TEs, the proportion of patients who need OAC therapy according to CAS and CHA<sub>2</sub>DS<sub>2</sub>-VA stroke risk score.**

| <b>To identify a specific proportion of patients who will experience TEs (%)</b> | <b>Proportion of patients who need to be treated with OAC according to CAS score (%)</b> | <b>Proportion of patients who need to be treated with OAC according to CHA<sub>2</sub>DS<sub>2</sub>-VA score (%)</b> |
|----------------------------------------------------------------------------------|------------------------------------------------------------------------------------------|-----------------------------------------------------------------------------------------------------------------------|
| 50                                                                               | 24.5                                                                                     | 28.2                                                                                                                  |
| 60                                                                               | 32.4                                                                                     | 37.5                                                                                                                  |
| 70                                                                               | 44.4                                                                                     | 47.1                                                                                                                  |
| 80                                                                               | 56.4                                                                                     | 58.6                                                                                                                  |
| 90                                                                               | 68.5                                                                                     | 74.5                                                                                                                  |
| 95                                                                               | 83.6                                                                                     | 86.5                                                                                                                  |

CAS: Congestive heart failure or left ventricular dysfunction, Age, and prior Stroke; OAC: Oral anticoagulants; TEs: Thromboembolic events.

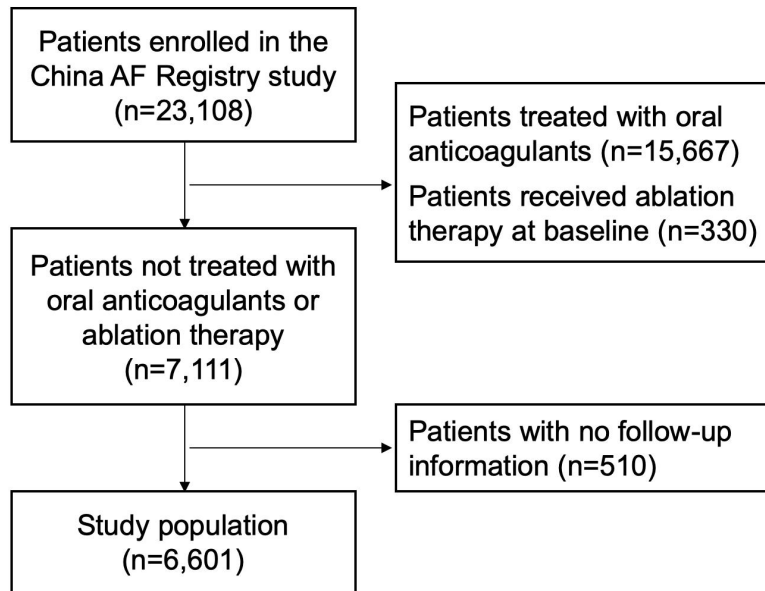

**Supplementary Figure 1: Patient selection flowchart.**

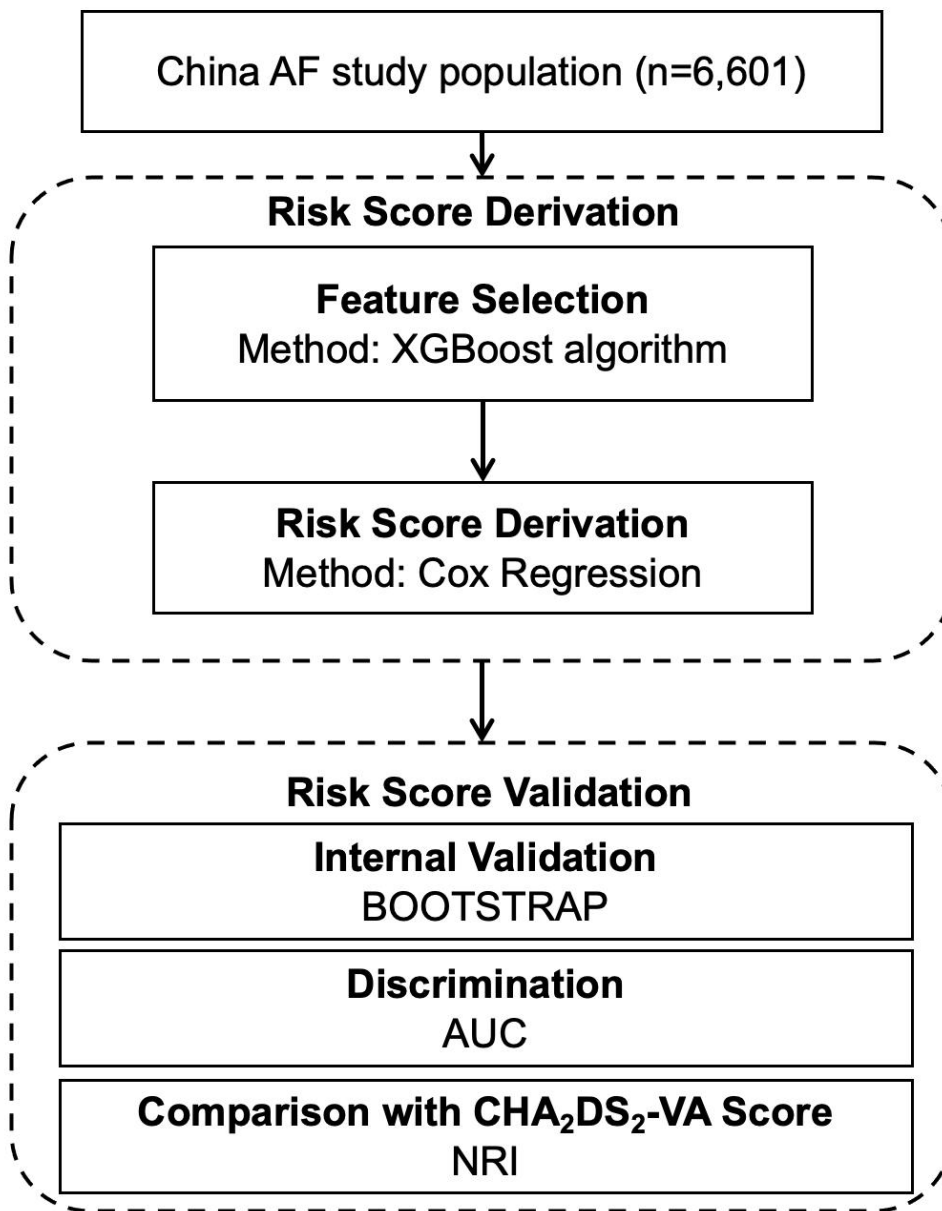

Supplementary Figure 2: Illustration of methodology.

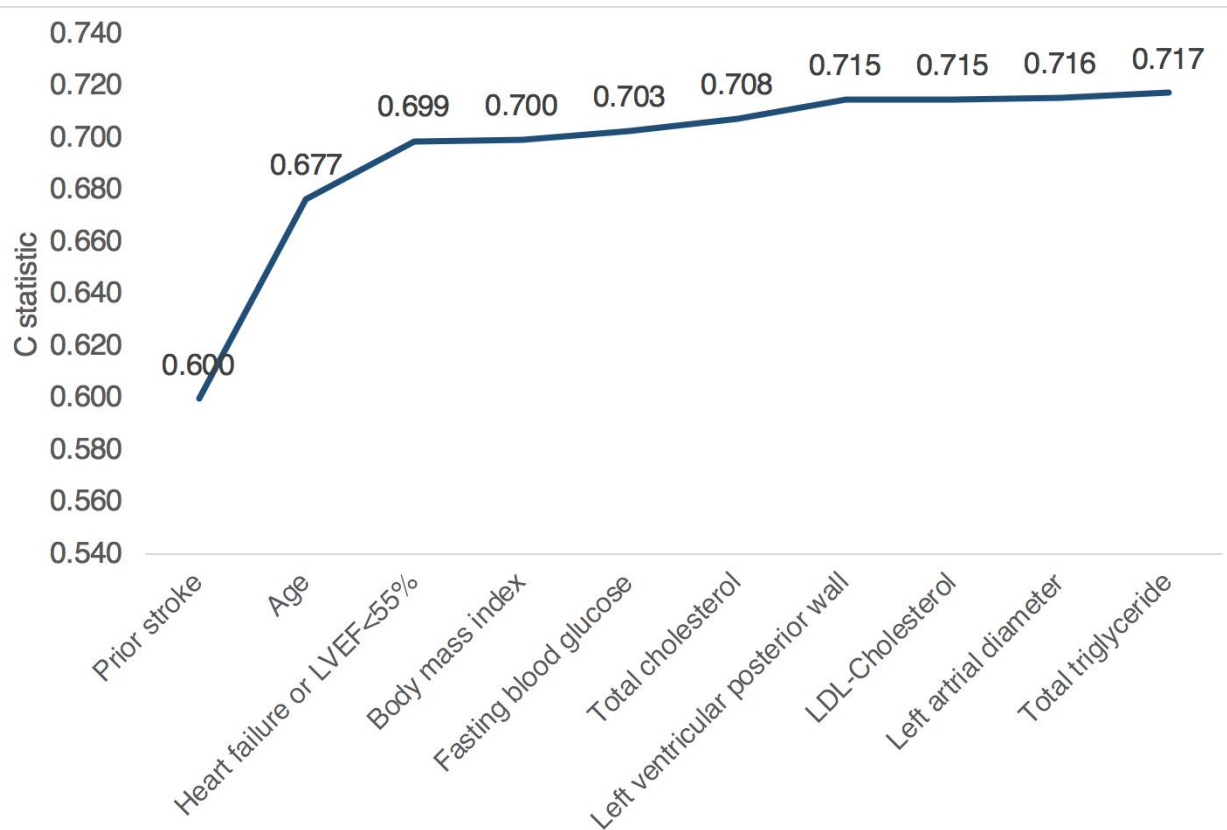

**Supplementary Figure 3: Prediction ability with increasing variables included.** LVEF: Left ventricular ejection fraction; LDL: Low density lipoprotein.
